Modulation of *Insr* and insulin receptor signaling by hyperinsulinemia *in vitro* and *in vivo*

Haoning Cen (岑浩宁)<sup>1</sup>, José Diego Botzelli<sup>1</sup>, James D. Johnson<sup>1\*</sup>

<sup>1</sup> Department of Cellular and Physiological Sciences, Life Science Institute, University of British Columbia, Vancouver, BC, Canada.

Running title : Hyperinsulinemia-induced insulin resistance

\*Address correspondence to: James D. Johnson, Ph.D., Professor, Diabetes Research Group, Dept. of Cellular and Physiological Sciences & Dept. of Surgery, University of British Columbia, 5358 Life Sciences Building, 2350 Health Sciences Mall, Vancouver, BC, Canada, V6T 1Z3; E-mail: James.D.Johnson@ubc.ca; Fax: (604) 822-2316; Twitter: @JimJohnsonSci

**Keywords:** insulin, insulin receptor, insulin resistance, skeletal muscle, FOXO, cell signaling, cell surface receptor

---

## ABSTRACT

Hyperinsulinemia is often viewed as a compensatory mechanism for insulin resistance, but recent studies have shown that high levels of insulin may also contribute to insulin resistance. The precise mechanisms by which hyperinsulinemia contributes to insulin resistance remain poorly defined. To understand the direct effects of prolonged exposure to excess insulin in muscle cells, we incubated differentiated C2C12 myotubes with 200 nM insulin for 16 hours, followed by a 6-hour period of serum starvation, before examining insulin signaling. Using this model, we found that prolonged high insulin treatment significantly increased the phosphorylation of insulin receptor and AKT but not ERK. After serum starvation, acute AKT and ERK signaling stimulated by 0.2 - 20 nM insulin were attenuated. Total and surface insulin receptor protein levels are significantly downregulated by hyperinsulinemia,

which resulted in an inhibition of acute insulin signaling. Mechanistically, we found that both isoforms of insulin receptor mRNA were reduced by hyperinsulinemia and implicated the transcription factor FOXO1. Interestingly, 6h serum starvation reversed the effects of high insulin on basal phosphorylation of insulin receptor, AKT and FOXO1 and insulin receptor transcription. Finally, we validated our results *in vivo*, by determining that insulin receptor levels in mouse skeletal muscle were negatively correlated with circulating insulin. Together, our findings shed light on the mechanisms underlying hyperinsulinemia-induced insulin resistance in muscle cells, which are likely to be relevant in the pathogenesis of type 2 diabetes.

---

## Introduction

Hyperinsulinemia and insulin resistance are cardinal features of type 2 diabetes and highly associated with each other. It is a widely held

## *Hyperinsulinemia-induced insulin resistance*

view that insulin resistance is the primary cause of type 2 diabetes and that hyperinsulinemia is a compensatory response (1-4). However, a growing body of evidence suggests the opposite may be true (5-8). Hyperinsulinemia can be observed prior to insulin resistance in obesity and T2D (9-11). Indeed, hyperinsulinemia is the strongest predictor of T2D in long-term studies (12,13). Our group has recently shown that hyperinsulinemia can contribute causally to age-dependent insulin resistance in the absence of changes in glycemia (14). Reducing hyperinsulinemia using partial insulin gene knockout was also found to prevent and reverse diet-induced obesity in adult mice (14-16). Healthy humans (17,18) and rodents (19,20) subjected to prolonged insulin administration also have reduced insulin responsiveness independent of hyperglycemia, strongly suggesting that hyperinsulinemia is a self-perpetuating cause of insulin resistance.

The mechanisms by which hyperinsulinemia contributes to insulin resistance remains poorly understood. The insulin receptor (INSR) is a critical component as the starting point of insulin action. It has been reported that diabetic or obese rodent models with hyperinsulinemia and insulin resistance have reduced insulin binding to the liver (21-23), fat (24-26) and pancreatic acinar cells (27). The insulin binding defect appeared to be due to INSR downregulation rather than immediate changes in binding affinity since chronic (2-16 hours), but not acute, high insulin exposure directly reduced insulin binding and INSR

protein levels in adipocytes (28) and lymphocytes (29) *in vitro*. However, the molecular mechanisms of INSR downregulation and post-receptor insulin resistance are poorly characterized.

In the present study, we employed a model of *in vitro* insulin resistance using a muscle cell line. We found that prolonged hyperinsulinemia induced insulin resistance featuring blunted acute AKT and ERK signaling and INSR downregulation. Reduced *Insr* transcription and FOXO1 activity contributed to the INSR downregulation. We confirmed the inverse relationship between hyperinsulinemia and INSR abundance *in vivo*.

## **Results**

### ***Hyperinsulinemia induces insulin resistance in muscle cells in vitro***

To establish a muscle-cell model of hyperinsulinemia-induced insulin resistance, differentiated mouse C2C12 myotubes were cultured in 200 nM insulin for 16 hours (Fig. 1A). After 6-hour serum starvation, insulin signaling was characterized by measuring the phosphorylation of AKT and ERK proteins, which represent the two major insulin signaling pathways (30). For high-insulin treated cells, AKT phosphorylation at threonine (T) 308 and serine (S) 473 were significantly reduced at several time points under 0.2, 2, or 20 nM insulin stimulations (Fig. 1B). Similarly, ERK1/2 also had reduced phosphorylation (Fig. 1C). Total AKT and ERK1/2 levels were not significantly different after starvation (Fig. 1D).

### *Hyperinsulinemia-induced insulin resistance*

Therefore, both AKT and ERK signaling branches of acute insulin signaling were blunted, confirming insulin resistance in the cells exposed to hyperinsulinemia.

Alterations in the basal state of the insulin signal transduction network have also been reported in hyperinsulinemic patients and animals (31). Therefore, we measured the effects of hyperinsulinemia on AKT and ERK phosphorylation before and after serum starvation. After prolonged hyperinsulinemia and before serum starvation, T308 and S473 phosphorylation of AKT was significantly elevated ~4 fold, but ERK phosphorylation was unaffected (Fig. 1D). Interestingly, basal p-AKT and p-ERK1/2 in the hyperinsulinemia group became lower relative to the controls after serum starvation (Fig. 1D), which may predispose the AKT and ERK signaling pathway to milder response to the following acute insulin stimulation. Of note, p-ERK1/2 was increased by serum starvation, as previously reported in other cell types (32,33), but not hyperinsulinemia (Fig. 1D). Total AKT and ERK were also downregulated by hyperinsulinemia, but this effect was completely rescued by serum starvation. Thus, the attenuated acute insulin signaling was not limited by total AKT and ERK. Together, these results establish a robust muscle cell insulin resistance model induced by hyperinsulinemia and characterized its effects on time and dose-dependent insulin signaling.

#### ***Hyperinsulinemia reduces INSR protein abundance but not its phosphorylation***

To understand how hyperinsulinemia induces insulin resistance, we started at the insulin receptor (INSR), the initial point of insulin signaling. Remarkably, we found the total INSR protein abundance was robustly decreased both before and after serum starvation (Fig. 2A). As insulin can only access surface INSR to initiate signaling, we employed surface biotinylation assay to measure the surface INSR (Fig. 2B). Surface INSR was indeed decreased after hyperinsulinemia both before and after starvation, while the surface-to-total INSR ratio was only slightly increased before starvation (Fig. 2C), indicating increased surface translocation, reduced internalization or increased degradation of intracellular INSR. Furthermore, serum starvation decreased surface-to-total INSR ratio in the control group (Fig. 2C), suggesting that INSR localization is tightly regulated by its ligand concentration. Therefore, hyperinsulinemia-induced insulin resistance is mediated by a reduction in total INSR that results in a proportional reduction in INSR protein at the cell surface, and the subcellular localization of INSR can adapt to the ambient insulin concentration.

INSR autophosphorylation upon insulin binding is a key initial step of insulin signaling, which recruits IRS and SHC that leads to the activation of PI3K-AKT or RAS-ERK signaling branches (34). Therefore, we examined the tyrosine(Y) 1150/1151 phosphorylation of INSR. Similar to AKT, hyperinsulinemia induced a ~9-fold increase in INSR phosphorylation, suggesting that there is continuous insulin

### *Hyperinsulinemia-induced insulin resistance*

signaling during the high insulin treatment (Fig. 3A). Serum starvation completely reversed INSR hyperphosphorylation (Fig. 3A). The phosphorylated-to-total INSR ratio was slightly increased in the high-insulin treated group under acute insulin stimulations (Fig. 3B). However, p-INSR-to-tubulin ratio, which is proportional to the overall INSR phosphorylation events per cell, was decreased at several time points (Fig. 3C). The increased INSR phosphorylation per receptor could be compensation to reduced INSR number, indicating that INSR does not have defects in autophosphorylation upon acute insulin stimulation. Thus, the limited availability of surface and total INSR contributes to the reduced INSR signaling.

### ***Hyperinsulinemia decreases *Insr* mRNA via FOXO1 inhibition***

One possible cause of INSR downregulation would be the reduced expression of the *Insr* gene (27). To test this hypothesis, we measured the mRNA of *Insr* isoforms A and B (*Insr-A* and *Insr-B*) by qPCR. In our hands, *Insr-A* is the predominant isoform in C2C12 myotubes (Fig. 4A). Both *Insr-A* and *Insr-B* mRNA were equally downregulated after hyperinsulinemia and partially recovered after serum starvation (Fig. 4A), consistent with the change of INSR protein abundance. Interestingly, insulin-like growth factor 1 receptor (IGF1R), which has high similarity in structure and signaling as INSR (35), was also reduced at the transcriptional level (Fig. 4B). Alteration in *Insr* alternative splicing has been implicated in

insulin resistance and T2D (36-41). Here, the ratio of *Insr-A* and *Insr-B* mRNA was not affected by hyperinsulinemia or serum starvation (Fig. 4C), indicating that hyperinsulinemia and starvation did not affect the alternative splicing of *Insr* transcripts in our model. Our evidence suggests that hyperinsulinemia and serum starvation regulate INSR protein at the transcriptional level.

Forkhead box protein O1 (FOXO1) is a known transcriptional regulator of the *Insr* gene and is also a key mediator of insulin signaling (42-44). In *Drosophila* and mouse myoblasts, FOXO1 activity is necessary and sufficient to increase *Insr* transcription under serum fasting and reverse this effect in the presence of insulin (43). Therefore, we sought to determine the activity of FOXO1 in our hyperinsulinemic model. Indeed, high insulin inhibited FOXO1 via increased phosphorylation on T24, which is an Akt-associated event known to exclude this protein from the nucleus and decrease FOXO transcriptional activity (45), but did not affect total FOXO1 abundance (Fig. 4D). T24 phosphorylation of FOXO1 significantly decreased after starvation (Fig. 4D), consistent with our observed effects on AKT phosphorylation and *Insr* transcription. Together, these data strongly suggest that hyperinsulinemia downregulates *Insr* transcription via FOXO1 phosphorylation.

### ***Circulating insulin negatively correlates with INSR level in vivo***

To validate our *in vitro* studies, in a specific

### *Hyperinsulinemia-induced insulin resistance*

*in vivo* model of hyperinsulinemia, we further examined the relationship of insulin concentration and INSR level in mice fed a high-fat diet. Mice with different insulin gene dosage (*Ins1<sup>+/+</sup>;Ins2<sup>-/-</sup>* and *Ins1<sup>+/-</sup>;Ins2<sup>-/-</sup>*) previously studied by our group (15) were used to generate variance in circulating insulin. The mice were fed with high-fat diet (HFD) known to induced pronounced hyperinsulinemia (15,46) or low-fat diet (LFD). INSR protein abundance in skeletal muscle was measured by western blots. INSR levels negatively correlated with both fasting insulin and fasting glucose in the HFD group (Fig. 5A-B). However, the LFD group only had a significantly negative correlation between INSR level and insulin, with no correlation between INSR and glucose (Fig. 5C-D). These data support the concept that insulin, independent from glucose, can negatively regulate INSR levels in skeletal muscle, consistent with our *in vitro* hyperinsulinemia model and our previous *in vivo* data demonstrating improved insulin sensitivity over time in mice with genetically reduced insulin production (14). These data also suggest an interaction between insulin, glucose and INSR that is dependent on the conditions of the HFD.

### **Discussion**

The goal of this study was to explore the mechanisms of hyperinsulinemia-induced insulin resistance in skeletal muscle cells. We confirmed that prolonged hyperinsulinemia induced sustained reduction of AKT and ERK

signaling, which was characterized over time after acute stimulation with insulin at multiple doses. We demonstrated that the impaired insulin response originates with INSR downregulation at the transcription level downstream of FOXO1 phosphorylation. Serum starvation partially reversed the effects of hyperinsulinemia. We also validated our *in vitro* system *in vivo* in mice with varying degrees of diet-induced hyperinsulinemia.

Our *in vitro* cell culture model provided a robust and controlled system for examining the direct effects of excess insulin, and insulin withdrawal, on insulin signaling. Our results are consistent with other *in vitro* cell culture systems designed to examine the effects of hyperinsulinemia. For example, recent studies also reported reduced AKT and ERK signaling and INSR abundance in high-insulin treated  $\beta$ -cells and enteroendocrine L cells (47,48). Increased basal AKT phosphorylation and unaltered ERK phosphorylation have also been reported in neurons treated with elevated insulin for 24 hours (49). It has been suggested that increased basal AKT mediates insulin resistance because an AKT inhibitor, but not ERK inhibitor, improved insulin resistance (49,50). Our observations verified the independent responses of the bifurcate insulin signaling pathways during hyperinsulinemia. It is worth noting that the AKT and ERK phosphorylation appeared to be suppressed at all time points in our studies, suggesting that the insulin resistance we observed was impaired responsiveness instead of a change in sensitivity; this is consistent with

### *Hyperinsulinemia-induced insulin resistance*

signaling deficiencies at both the receptor level and in post-receptor components (51). Remarkably, the impaired acute insulin signaling due to 16 hours of hyperinsulinemia we observed was sustained after 6 hours of insulin withdrawal, suggesting that long-term molecular changes underlie these differences.

The main finding of our study was that that hyperinsulinemia directly reduced *Insr* mRNA in cultured cells, consistent with reports from other cell culture systems (27,52). In a previous study, we observed a ~20% increase in *Insr* mRNA from skeletal muscle samples of *Insl<sup>+/+</sup>;Ins2<sup>-/-</sup>* mice compared to *Insl<sup>+/+</sup>;Ins2<sup>-/-</sup>* mice, as well as a trend of a ~50% increase in *Foxo1* (15). Our *in vivo* data in mice are also consistent with the limited data from human studies. For example, T2D patients with higher fasting insulin were found to have lower *Insr* mRNA expression in skeletal muscle biopsies (53). While relative hyperglycemia can increase *Insr* expression in lymphocyte and cancer cell lines (54,55), high glucose inhibits  $\beta$ -cells *Insr* expression through autocrine insulin action and Insr-FoxO1 signaling (54,55). Interestingly, glucose can only induce insulin resistance in the presence of insulin in cultured hepatocytes, adipocytes and skeletal muscle (25,56,57). Therefore, reduced *Insr* expression by hyperinsulinemia may be a key, independent factor of INSR downregulation and insulin resistance.

Hyperinsulinemia promoted the surface localization of INSR in the present study, while serum starvation had the opposite effect. The

mechanisms by which INSR localization is regulated remain poorly understood. A recent study demonstrated that the E3 ligase, MARCH1, can specifically ubiquitinate surface INSR, leading to their internalization and degradation (58). Interestingly, FOXO1 is also a transcription factor for *March1* gene, and insulin-induced FOXO1 inhibition downregulates MARCH1, resulting in increased surface INSR (58). Therefore, the INSR localization regulated by ambient insulin in our model may associate with MARCH1 function.

Intermittent fasting, time restricted feeding, caloric restriction, and/or carbohydrate restriction have been shown to have health benefits in diabetes, including lowering insulin and glucose levels, increasing insulin sensitivity, and improving  $\beta$  cell responsiveness (59-63). Several human trials suggest that these fasting regimes are more effective on reducing insulin and increasing insulin sensitivity than on reducing glucose (62,64-67). By mimicking the low-insulin state, the serum starvation phase of our studies revealed some possible molecular mechanisms of the beneficial effects of fasting, which includes restoration of AKT and ERK protein levels, protein phosphorylation in insulin signaling pathways, and partial recovery of *Insr* transcription. These data hint that many deleterious effects of hyperinsulinemia are reversible but may require a long enough low-insulin period.

The present study has limitations and unanswered questions. We employed a 16-hour incubation with a super-physiological insulin

## *Hyperinsulinemia-induced insulin resistance*

dosage (200 nM) instead of more chronic treatment with lower insulin. The main reason is that insulin promotes the further differentiation of C2C12 myotubes (68), thus chronic treatment during differentiation introduces variance in the muscle cell model. Hyperinsulinemia is also known to downregulate proteins such as IRS1, IRS2, GLUT4 (69-72), and our study was not comprehensive in this regard. Thus, it would be interesting to examine the effect of hyperinsulinemia and fasting on other signaling molecules in our model to further dissect the cause of insulin resistance. In addition, besides FOXO1, other transcription factors such as SP1, HMGA1, C/EBP $\beta$  and NUCKS have been shown to regulate *Insr* expression (73-77). For example, HMGA1 is downregulated in diabetes, which inhibits *Insr* as well as *Foxo1* transcription (76). The roles of these other transcriptional regulators in hyperinsulinemia could be investigated in future studies using our system. INSR degradation and proteolysis are also increased by high insulin in lymphocyte and adipocytes (27,28,78). Although *Insr* mRNA and protein cannot be directly compared, the fold reduction of *Insr* mRNA was smaller than fold reduction of INSR protein in our cell model, suggesting that additional mechanisms are involved. Therefore, the mechanisms of INSR and insulin signalling down-regulation in hyperinsulinemia-induced insulin resistance will require more detailed future investigations.

Despite its inherent reductionism, our *in vitro* model reemphasized the critical and detrimental role of hyperinsulinemia in the

development of insulin resistance and T2D. We demonstrated that *in vitro* hyperinsulinemia and serum fasting had profound effects and interactions in regulating AKT and ERK signaling and protein levels, INSR levels and surface localization, and transcriptional activities, which provided valuable insights on the molecular mechanisms of insulin resistance. Future additional characterization of the effect of hyperinsulinemism on INSR trafficking, degradation, and detailed post-receptor alterations will provide more insight in the molecular mechanisms of diabetes progression and further highlights dysregulated basal insulin as a direct cause and hallmark of diabetes.

## **Experimental Procedures**

### ***Cell culture***

The C2C12 mouse myoblast cell line (ATCC cell line provided by Dr. Brain Rodrigues, University of British Columbia, Vancouver, Canada) was maintained in Dulbecco's modified Eagle's medium (DMEM, Invitrogen) supplemented with 10% (v/v) fetal bovine serum (FBS, Gibco), and 1% penicillin-streptomycin (100  $\mu$ g/ml; Gibco). For downstream analysis,  $8 \times 10^5$  cells/well of cells were seeded in 6-well plates and cultured at 37 °C under 5% CO<sub>2</sub>. Confluent (90%) myoblasts were differentiated into myotubes by culturing the cells in differentiation medium (DMEM supplemented with 2% horse serum and 1% penicillin-streptomycin) for 10 days. To induce insulin resistance by hyperinsulinemia *in vitro*, C2C12 myotubes were cultured in

## Hyperinsulinemia-induced insulin resistance

differentiation medium containing 200 nM insulin (Cat.# I9278, Sigma) for 16 hours prior to reaching day 10 (Fig.1). For serum starvation, myotubes are maintained in serum-free medium (DMEM supplemented with 1% penicillin-streptomycin) for 6 hours. All experiments were repeated with biological replicates using cells in different passages.

### Experimental Animals

Animal protocols were approved by the University of British Columbia Animal Care Committee. *Ins1<sup>+/+</sup>;Ins2<sup>-/-</sup>* and *Ins1<sup>+/-</sup>;Ins2<sup>-/-</sup>* mice were randomly assigned to be fed *ad libitum* either a high fat diet (Research Diets D12492, 20% protein, 60% fat, 20% carbohydrate content, energy density 5.21Kcal/g, Brunswick, NJ, US) or low fat diet (Research Diets D12450B, 20% protein 10% fat, 70% carbohydrate content, energy density 3.82Kcal/g, Brunswick, NJ, US) for 4 weeks starting from 8 weeks old. Blood fasting glucose was measured using OneTouch Ultra2 glucose meters (LifeScan Canada Ltd, BC, Canada), and serum fasting insulin were assessed using mouse insulin ELISA kit (Alpco Diagnostics, Salem, NH, USA), following 4-hour fasting.

### RNA isolation and quantitative real-time PCR analysis

Before and after serum starvation, total RNA was isolated from both control and high insulin-treated C2C12 myotubes using the RNEasy mini kit (Qiagen). cDNA was generated by reverse transcription using qScript cDNA

synthesis kit (Quanta Biosciences, Gaithersburg, MD, USA). Transcript levels of target genes in the equal amount of total cDNA were quantified with SYBR green chemistry (Quanta Biosciences) on a StepOnePlus Real-time PCR System (Applied Biosystems). All data were normalized to *Hprt* by the  $2^{-\Delta Ct}$  method (79). The following primers are used in qPCR: *Insr-A/B* forward 5'-TCCTGAAGGAGCTGGAGGAGT-3', *Insr-A* reverse 5'-CTTTCGGGATGGCC TGG-3', *Insr-B* reverse 5'-TTCGGGATGGCCT ACTGTC-3' (80); *Igf1r* forward 5'-GGCACAA CTACTGCTCCAAAG AC-3' and reverse 5'-CTTTATCACCACCACA CACTTCTG-3' (80); *Hprt* forward 5'-TCAGTCAACGGGGGACAT AAA-3' and reverse 5'-GGGGCTGTACTGCT TAACCAG-3' (81).

### Western blot analyses

C2C12 myotubes or mice skeletal muscle (gastrocnemius) tissues were sonicated in RIPA buffer (50 mM  $\beta$ -glycerol phosphate, 10 mM HEPES, 1% Triton X-100, 70 mM NaCl, 2 mM EGTA, 1 mM  $\text{Na}_3\text{VO}_4$ , and 1 mM NaF) supplemented with complete mini protease inhibitor cocktail (Roche, Laval, QC), and lysates were resolved by SDS-PAGE. Proteins were then transferred to PVDF membranes (BioRad, CA) and probed with antibodies against p-ERK1/2 (Thr202/Tyr204) (1:1000, Cat. #4370), ERK1/2 (1:1000, Cat. #4695), p-AKT (Ser473) (1:1000, Cat. #9271), p-AKT (Thr308) (1:1000, Cat. #9275), AKT (1:1000, Cat. #9272), INSR- $\beta$  subunit (1:1000, Cat. #3020S), p-INSR $\beta$  (Tyr1150/1151) (1:1000, Cat. #3024), FOXO1



### *Hyperinsulinemia-induced insulin resistance*

(1:1000, Cat. #2880), p-FOXO1 (Thr24) (1:1000, Cat. #9464), all from Cell Signalling (CST), and  $\beta$ -tubulin (1:2000, Cat. #T0198, Sigma). The signals were detected by secondary HRP-conjugated antibodies (Anti-mouse, Cat. #7076; Anti-rabbit, Cat. #7074; CST) and Pierce ECL Western Blotting Substrate (Thermo Fisher Scientific).

#### ***Surface Protein Biotinylation Assay***

Biotinylation of surface proteins was performed as previously described(82) with modifications (Fig. 2B). In brief, cells were incubated with cell-impermeable EZ-Link-NHS-SS-biotin (300  $\mu$ g/ml in PBS; Pierce) at 37 °C for 2 min. Cells were then immediately placed on ice and washed with ice-cold 50 mM Tris-buffered saline (TBS) to remove excess biotin. Next, cells were washed using ice-cold PBS and lysed in RIPA buffer supplemented with

cOmplete mini protease inhibitor cocktail (Roche, Laval, QC). Lysates were quantitated and incubated with NeutrAvidin beads (Pierce) overnight at 4 °C to isolate biotinylated surface proteins. Surface proteins were eluted from the NeutrAvidin beads by boiling in Blue Loading Buffer (CST) containing 50 mM DTT for 5 min. Surface INSR in eluent and total INSR in lysates were detected in Western blot analysis.

#### ***Statistics***

Data were presented as mean  $\pm$  SEM unless otherwise indicated. 2-way ANOVA or Student t-test were used as indicated (Prism; GraphPad). Specifically, western blot data in control and high-insulin groups at each acute insulin or starvation time point were tested by paired t-test because each replicate used the same batch of cells.  $p < 0.05$  was considered significant.

**Acknowledgments:** We gratefully acknowledge Dr. Brain Rodrigues for providing C2C12 cell line.

**Conflict of interest:** The authors declare that they have no conflicts of interest with the contents of this article.

**Contributions:** HC designed the study, performed experiments, analyzed data and wrote the manuscript. JDB performed experiments and analyzed data. JDJ designed the study, supervised the research and edited the manuscript.

**Funding:** This study was funded by a CIHR Operating Grant to JDJ.

## References

1. DeFronzo, R. A. (2009) Banting Lecture. From the triumvirate to the ominous octet: a new paradigm for the treatment of type 2 diabetes mellitus. *Diabetes* **58**, 773-795
2. DeFronzo, R. A., and Tripathy, D. (2009) Skeletal muscle insulin resistance is the primary defect in type 2 diabetes. *Diabetes Care* **32 Suppl 2**, S157-163
3. Prentki, M., and Nolan, C. J. (2006) Islet beta cell failure in type 2 diabetes. *J Clin Invest* **116**, 1802-1812
4. Taylor, S. I., Accili, D., and Imai, Y. (1994) Insulin resistance or insulin deficiency. Which is the primary cause of NIDDM? *Diabetes* **43**, 735-740
5. Corkey, B. E. (2012) Banting lecture 2011: hyperinsulinemia: cause or consequence? *Diabetes* **61**, 4-13
6. Shanik, M. H., Xu, Y., Skrha, J., Dankner, R., Zick, Y., and Roth, J. (2008) Insulin resistance and hyperinsulinemia: is hyperinsulinemia the cart or the horse? *Diabetes Care* **31 Suppl 2**, S262-268
7. Templeman, N. M., Skovso, S., Page, M. M., Lim, G. E., and Johnson, J. D. (2017) A causal role for hyperinsulinemia in obesity. *J Endocrinol* **232**, R173-R183
8. Page, M. M., and Johnson, J. D. (2018) Mild Suppression of Hyperinsulinemia to Treat Obesity and Insulin Resistance. *Trends Endocrinol Metab* **29**, 389-399
9. Le Stunff, C., and Bougneres, P. (1994) Early changes in postprandial insulin secretion, not in insulin sensitivity, characterize juvenile obesity. *Diabetes* **43**, 696-702
10. Spadaro, L., Alagona, C., Palermo, F., Piro, S., Calanna, S., Parrinello, G., Purrello, F., and Rabuazzo, A. M. (2011) Early phase insulin secretion is increased in subjects with normal fasting glucose and metabolic syndrome: a premature feature of beta-cell dysfunction. *Nutr Metab Cardiovasc Dis* **21**, 206-212
11. Tricò, D., Natali, A., Arslanian, S., Mari, A., and Ferrannini, E. (2018) Identification, pathophysiology, and clinical implications of primary insulin hypersecretion in nondiabetic adults and adolescents. *JCI Insight* **3**
12. Dankner, R., Chetrit, A., Shanik, M. H., Raz, I., and Roth, J. (2012) Basal state hyperinsulinemia in healthy normoglycemic adults heralds dysglycemia after more than two decades of follow up. *Diabetes Metab Res Rev* **28**, 618-624
13. Zimmet, P. Z., Collins, V. R., Dowse, G. K., and Knight, L. T. (1992) Hyperinsulinaemia in youth is a predictor of type 2 (non-insulin-dependent) diabetes mellitus. *Diabetologia* **35**, 534-541
14. Templeman, N. M., Flibotte, S., Chik, J. H. L., Sinha, S., Lim, G. E., Foster, L. J., Nislow, C., and Johnson, J. D. (2017) Reduced Circulating Insulin Enhances Insulin Sensitivity in Old Mice and Extends Lifespan. *Cell Rep* **20**, 451-463

15. Mehran, A. E., Templeman, N. M., Brigidi, G. S., Lim, G. E., Chu, K. Y., Hu, X., Botezelli, J. D., Asadi, A., Hoffman, B. G., Kieffer, T. J., Bamji, S. X., Clee, S. M., and Johnson, J. D. (2012) Hyperinsulinemia drives diet-induced obesity independently of brain insulin production. *Cell Metab* **16**, 723-737
16. Page, M. M., Skovso, S., Cen, H., Chiu, A. P., Dionne, D. A., Hutchinson, D. F., Lim, G. E., Szabat, M., Flibotte, S., Sinha, S., Nislow, C., Rodrigues, B., and Johnson, J. D. (2018) Reducing insulin via conditional partial gene ablation in adults reverses diet-induced weight gain. *FASEB J* **32**, 1196-1206
17. Marangou, A. G., Weber, K. M., Boston, R. C., Aitken, P. M., Heggie, J. C., Kirsner, R. L., Best, J. D., and Alford, F. P. (1986) Metabolic consequences of prolonged hyperinsulinemia in humans. Evidence for induction of insulin insensitivity. *Diabetes* **35**, 1383-1389
18. Del Prato, S., Leonetti, F., Simonson, D. C., Sheehan, P., Matsuda, M., and DeFronzo, R. A. (1994) Effect of sustained physiologic hyperinsulinaemia and hyperglycaemia on insulin secretion and insulin sensitivity in man. *Diabetologia* **37**, 1025-1035
19. Hamza, S. M., Sung, M. M., Gao, F., Soltys, C. M., Smith, N. P., MacDonald, P. E., Light, P. E., and Dyck, J. R. (2017) Chronic insulin infusion induces reversible glucose intolerance in lean rats yet ameliorates glucose intolerance in obese rats. *Biochim Biophys Acta Gen Subj* **1861**, 313-322
20. Yang, X., Mei, S., Gu, H., Guo, H., Zha, L., Cai, J., Li, X., Liu, Z., and Cao, W. (2014) Exposure to excess insulin (glargine) induces type 2 diabetes mellitus in mice fed on a chow diet. *J Endocrinol* **221**, 469-480
21. Soll, A. H., Kahn, C. R., and Neville, D. M. (1975) Insulin binding to liver plasma membranes in the obese hyperglycemic (ob/ob) mouse. Demonstration of a decreased number of functionally normal receptors. *J Biol Chem* **250**, 4702-4707
22. Kahn, C. R., Freychet, P., Roth, J., and Neville, D. M. (1974) Quantitative aspects of the insulin-receptor interaction in liver plasma membranes. *J Biol Chem* **249**, 2249-2257
23. Dominici, F. P., Balbis, A., Bartke, A., and Turyn, D. (1998) Role of hyperinsulinemia on hepatic insulin receptor concentration and autophosphorylation in the presence of high growth hormone levels in transgenic mice overexpressing growth hormone gene. *J Endocrinol* **159**, 15-25
24. Freychet, P., Laudat, M. H., Laudat, P., Rosselin, G., Kahn, C. R., Gorden, P., and Roth, J. (1972) Impairment of insulin binding to the fat cell plasma membrane in the obese hyperglycemic mouse. *FEBS Lett* **25**, 339-342
25. Garvey, W. T., Olefsky, J. M., and Marshall, S. (1985) Insulin receptor down-regulation is linked to an insulin-induced postreceptor defect in the glucose transport system in rat adipocytes. *J Clin Invest* **76**, 22-30
26. Pedersen, O., and Hjöllund, E. (1982) Insulin receptor binding to fat and blood cells and insulin action in fat cells from insulin-dependent diabetics. *Diabetes* **31**, 706-715

27. Okabayashi, Y., Maddux, B. A., McDonald, A. R., Logsdon, C. D., Williams, J. A., and Goldfine, I. D. (1989) Mechanisms of insulin-induced insulin-receptor downregulation. Decrease of receptor biosynthesis and mRNA levels. *Diabetes* **38**, 182-187
28. Ronnett, G. V., Knutson, V. P., and Lane, M. D. (1982) Insulin-induced down-regulation of insulin receptors in 3T3-L1 adipocytes. Altered rate of receptor inactivation. *J Biol Chem* **257**, 4285-4291
29. Gavin, J. R., Roth, J., Neville, D. M., de Meyts, P., and Buell, D. N. (1974) Insulin-dependent regulation of insulin receptor concentrations: a direct demonstration in cell culture. *Proc Natl Acad Sci USA* **71**, 84-88
30. Bevan, P. (2001) Insulin signaling. *Journal of Cell Science*
31. Fröjdö, S., Vidal, H., and Pirola, L. (2009) Alterations of insulin signaling in type 2 diabetes: a review of the current evidence from humans. *Biochim Biophys Acta* **1792**, 83-92
32. Morikawa, Y., Ueyama, E., and Senba, E. (2004) Fasting-induced activation of mitogen-activated protein kinases (ERK/p38) in the mouse hypothalamus. *J Neuroendocrinol* **16**, 105-112
33. Ueyama, E., Morikawa, Y., Yasuda, T., and Senba, E. (2004) Attenuation of fasting-induced phosphorylation of mitogen-activated protein kinases (ERK/p38) in the mouse hypothalamus in response to refeeding. *Neurosci Lett* **371**, 40-44
34. Boucher, J., Kleinridders, A., and Kahn, C. R. (2014) Insulin receptor signaling in normal and insulin-resistant states. *Cold Spring Harb Perspect Biol* **6**
35. Nakae, J., Kido, Y., and Accili, D. (2001) Distinct and overlapping functions of insulin and IGF-I receptors. *Endocr Rev* **22**, 818-835
36. Malakar, P., Chartarifsky, L., Hija, A., Leibowitz, G., Glaser, B., Dor, Y., and Karni, R. (2016) Insulin receptor alternative splicing is regulated by insulin signaling and modulates beta cell survival. *Sci Rep* **6**, 31222
37. Norgren, S., Li, L. S., and Luthman, H. (1994) Regulation of human insulin receptor RNA splicing in HepG2 cells: effects of glucocorticoid and low glucose concentration. *Biochem Biophys Res Commun* **199**, 277-284
38. Sell, S. M., Reese, D., and Ossowski, V. M. (1994) Insulin-inducible changes in insulin receptor mRNA splice variants. *J Biol Chem* **269**, 30769-30772
39. Sbraccia, P., D'Adamo, M., Leonetti, F., Caiola, S., Iozzo, P., Giaccari, A., Buongiorno, A., and Tamburrano, G. (1996) Chronic primary hyperinsulinaemia is associated with altered insulin receptor mRNA splicing in muscle of patients with insulinoma. *Diabetologia* **39**, 220-225
40. Kaminska, D., Hämäläinen, M., Cederberg, H., Käkälä, P., Venesmaa, S., Miettinen, P., Ilves, I., Herzig, K. H., Kolehmainen, M., Karhunen, L., Kuusisto, J., Gylling, H., Laakso, M., and Pihlajamäki, J. (2014) Adipose tissue INSR splicing in humans associates with fasting insulin level and is regulated by weight loss. *Diabetologia* **57**, 347-351

41. Denley, A., Wallace, J. C., Cosgrove, L. J., and Forbes, B. E. (2003) The insulin receptor isoform exon 11- (IR-A) in cancer and other diseases: a review. *Horm Metab Res* **35**, 778-785
42. Orengo, D. J., Aguadé, M., and Juan, E. (2017) Characterization of dFOXO binding sites upstream of the Insulin Receptor P2 promoter across the Drosophila phylogeny. *Plos One* **12**, e0188357
43. Puig, O., and Tjian, R. (2005) Transcriptional feedback control of insulin receptor by dFOXO/FOXO1. *Genes Dev* **19**, 2435-2446
44. Ni, Y. G., Wang, N., Cao, D. J., Sachan, N., Morris, D. J., Gerard, R. D., Kuro-O, M., Rothermel, B. A., and Hill, J. A. (2007) FoxO transcription factors activate Akt and attenuate insulin signaling in heart by inhibiting protein phosphatases. *Proc Natl Acad Sci U S A* **104**, 20517-20522
45. Nakae, J., Kitamura, T., Ogawa, W., Kasuga, M., and Accili, D. (2001) Insulin regulation of gene expression through the forkhead transcription factor Foxo1 (Fkhr) requires kinases distinct from Akt. *Biochemistry* **40**, 11768-11776
46. El Akoum, S., Lamontagne, V., Cloutier, I., and Tanguay, J. F. (2011) Nature of fatty acids in high fat diets differentially delineates obesity-linked metabolic syndrome components in male and female C57BL/6J mice. *Diabetol Metab Syndr* **3**
47. Rachdaoui, N., Polo-Parada, L., and Ismail-Beigi, F. (2019) Prolonged Exposure to Insulin Inactivates Akt and Erk1/2 and Increases Pancreatic Islet and INS1E beta-Cell Apoptosis. *J Endocr Soc* **3**, 69-90
48. Lim, G. E., Huang, G. J., Flora, N., LeRoith, D., Rhodes, C. J., and Brubaker, P. L. (2009) Insulin regulates glucagon-like peptide-1 secretion from the enteroendocrine L cell. *Endocrinology* **150**, 580-591
49. Kim, B., McLean, L. L., Philip, S. S., and Feldman, E. L. (2011) Hyperinsulinemia induces insulin resistance in dorsal root ganglion neurons. *Endocrinology* **152**, 3638-3647
50. Liu, H. Y., Hong, T., Wen, G. B., Han, J., Zuo, D., Liu, Z., and Cao, W. (2009) Increased basal level of Akt-dependent insulin signaling may be responsible for the development of insulin resistance. *Am J Physiol Endocrinol Metab* **297**, E898-906
51. Kahn, C. R. (1978) Insulin resistance, insulin insensitivity, and insulin unresponsiveness: a necessary distinction. *Metabolism* **27**, 1893-1902
52. Zhang, Z., Li, X., Liu, G., Gao, L., Guo, C., Kong, T., Wang, H., Gao, R., Wang, Z., and Zhu, X. (2011) High insulin concentrations repress insulin receptor gene expression in calf hepatocytes cultured in vitro. *Cell Physiol Biochem* **27**, 637-640
53. Palsgaard, J., Brøns, C., Friedrichsen, M., Dominguez, H., Jensen, M., Storgaard, H., Spohr, C., Torp-Pedersen, C., Borup, R., De Meyts, P., and Vaag, A. (2009) Gene expression in skeletal muscle biopsies from people with type 2 diabetes and relatives: differential regulation of insulin signaling pathways. *Plos One* **4**, e6575

54. Martinez, S. C., Cras-Méneur, C., Bernal-Mizrachi, E., and Permutt, M. A. (2006) Glucose regulates Foxo1 through insulin receptor signaling in the pancreatic islet beta-cell. *Diabetes* **55**, 1581-1591
55. Briata, P., Briata, L., and Gherzi, R. (1990) Glucose starvation and glycosylation inhibitors reduce insulin receptor gene expression: characterization and potential mechanism in human cells. *Biochem Biophys Res Commun* **169**, 397-405
56. Liu, H. Y., Cao, S. Y., Hong, T., Han, J., Liu, Z., and Cao, W. (2009) Insulin is a stronger inducer of insulin resistance than hyperglycemia in mice with type 1 diabetes mellitus (T1DM). *J Biol Chem* **284**, 27090-27100
57. Ciaraldi, T. P., Abrams, L., Nikoulina, S., Mudaliar, S., and Henry, R. R. (1995) Glucose transport in cultured human skeletal muscle cells. Regulation by insulin and glucose in nondiabetic and non-insulin-dependent diabetes mellitus subjects. *J Clin Invest* **96**, 2820-2827
58. Nagarajan, A., Petersen, M. C., Nasiri, A. R., Butrico, G., Fung, A., Ruan, H. B., Kursawe, R., Caprio, S., Thibodeau, J., Bourgeois-Daigneault, M. C., Sun, L., Gao, G., Bhanot, S., Jurczak, M. J., Green, M. R., Shulman, G. I., and Wajapeyee, N. (2016) MARCH1 regulates insulin sensitivity by controlling cell surface insulin receptor levels. *Nat Commun* **7**, 12639
59. Mattson, M. P., Longo, V. D., and Harvie, M. (2017) Impact of intermittent fasting on health and disease processes. *Ageing Res Rev* **39**, 46-58
60. Patterson, R. E., and Sears, D. D. (2017) Metabolic Effects of Intermittent Fasting. *Annu Rev Nutr* **37**, 371-393
61. Varady, K. A., and Hellerstein, M. K. (2007) Alternate-day fasting and chronic disease prevention: a review of human and animal trials. *Am J Clin Nutr* **86**, 7-13
62. Varady, K. A. (2016) Impact of intermittent fasting on glucose homeostasis. *Curr Opin Clin Nutr Metab Care* **19**, 300-302
63. Nuttall, F. Q., Almokayyad, R. M., and Gannon, M. C. (2015) Comparison of a carbohydrate-free diet vs. fasting on plasma glucose, insulin and glucagon in type 2 diabetes. *Metabolism* **64**, 253-262
64. Sutton, E. F., Beyl, R., Early, K. S., Cefalu, W. T., Ravussin, E., and Peterson, C. M. (2018) Early Time-Restricted Feeding Improves Insulin Sensitivity, Blood Pressure, and Oxidative Stress Even without Weight Loss in Men with Prediabetes. *Cell Metab* **27**, 1212-1221 e1213
65. Trepanowski, J. F., Kroeger, C. M., Barnosky, A., Klempel, M. C., Bhutani, S., Hoddy, K. K., Gabel, K., Freels, S., Rigdon, J., Rood, J., Ravussin, E., and Varady, K. A. (2017) Effect of Alternate-Day Fasting on Weight Loss, Weight Maintenance, and Cardioprotection Among Metabolically Healthy Obese Adults: A Randomized Clinical Trial. *JAMA Intern Med* **177**, 930-938
66. Williams, K. V., Mullen, M. L., Kelley, D. E., and Wing, R. R. (1998) The effect of short periods of caloric restriction on weight loss and glycemic control in type 2 diabetes. *Diabetes Care* **21**, 2-8

67. Heilbronn, L. K., Civitarese, A. E., Bogacka, I., Smith, S. R., Hulver, M., and Ravussin, E. (2005) Glucose tolerance and skeletal muscle gene expression in response to alternate day fasting. *Obes Res* **13**, 574-581
68. Sumitani, S., Goya, K., Testa, J. R., Kouhara, H., and Kasayama, S. (2002) Akt1 and Akt2 differently regulate muscle creatine kinase and myogenin gene transcription in insulin-induced differentiation of C2C12 myoblasts. *Endocrinology* **143**, 820-828
69. Kubota, T., Inoue, M., Kubota, N., Takamoto, I., Mineyama, T., Iwayama, K., Tokuyama, K., Moroi, M., Ueki, K., Yamauchi, T., and Kadowaki, T. (2018) Downregulation of macrophage Irs2 by hyperinsulinemia impairs IL-4-induced M2a-subtype macrophage activation in obesity. *Nat Commun* **9**, 4863
70. Pirola, L., Bonnafous, S., Johnston, A. M., Chaussade, C., Portis, F., and Van Obberghen, E. (2003) Phosphoinositide 3-kinase-mediated reduction of insulin receptor substrate-1/2 protein expression via different mechanisms contributes to the insulin-induced desensitization of its signaling pathways in L6 muscle cells. *J Biol Chem* **278**, 15641-15651
71. Fornes, R., Ormazabal, P., Rosas, C., Gabler, F., Vantman, D., Romero, C., and Vega, M. (2010) Changes in the expression of insulin signaling pathway molecules in endometria from polycystic ovary syndrome women with or without hyperinsulinemia. *Mol Med* **16**, 129-136
72. Harmancey, R., Haight, D. L., Watts, K. A., and Taegtmeier, H. (2015) Chronic Hyperinsulinemia Causes Selective Insulin Resistance and Down-regulates Uncoupling Protein 3 (UCP3) through the Activation of Sterol Regulatory Element-binding Protein (SREBP)-1 Transcription Factor in the Mouse Heart. *J Biol Chem* **290**, 30947-30961
73. Foti, D., Iuliano, R., Chiefari, E., and Brunetti, A. (2003) A nucleoprotein complex containing Sp1, C/EBP beta, and HMGI-Y controls human insulin receptor gene transcription. *Mol Cell Biol* **23**, 2720-2732
74. Kim, H. S., Lee, J. K., and Tsai, S. Y. (1995) E1a activation of insulin receptor gene expression is mediated by Sp1-binding sites. *Mol Endocrinol* **9**, 178-186
75. Brunetti, A., Manfioletti, G., Chiefari, E., Goldfine, I. D., and Foti, D. (2001) Transcriptional regulation of human insulin receptor gene by the high-mobility group protein HMGI(Y). *FASEB J* **15**, 492-500
76. Foti, D., Chiefari, E., Fedele, M., Iuliano, R., Brunetti, L., Paonessa, F., Manfioletti, G., Barbetti, F., Brunetti, A., Croce, C. M., and Fusco, A. (2005) Lack of the architectural factor HMGA1 causes insulin resistance and diabetes in humans and mice. *Nat Med* **11**, 765-773
77. Qiu, B., Shi, X., Wong, E. T., Lim, J., Bezzi, M., Low, D., Zhou, Q., Akincilar, S. C., Lakshmanan, M., Swa, H. L., Tham, J. M., Gunaratne, J., Cheng, K. K., Hong, W., Lam, K. S., Ikawa, M., Guccione, E.,

- Xu, A., Han, W., and Tergaonkar, V. (2014) NUCKS is a positive transcriptional regulator of insulin signaling. *Cell Rep* **7**, 1876-1886
78. Mayer, C. M., and Belsham, D. D. (2010) Central insulin signaling is attenuated by long-term insulin exposure via insulin receptor substrate-1 serine phosphorylation, proteasomal degradation, and lysosomal insulin receptor degradation. *Endocrinology* **151**, 75-84
79. Livak, K. J., and Schmittgen, T. D. (2001) Analysis of relative gene expression data using real-time quantitative PCR and the 2<sup>-</sup>(Delta Delta C(T)) Method. *Methods* **25**, 402-408
80. Rowzee, A. M., Ludwig, D. L., and Wood, T. L. (2009) Insulin-like growth factor type 1 receptor and insulin receptor isoform expression and signaling in mammary epithelial cells. *Endocrinology* **150**, 3611-3619
81. Zhang, J., Tang, H., Zhang, Y., Deng, R., Shao, L., Liu, Y., Li, F., Wang, X., and Zhou, L. (2014) Identification of suitable reference genes for quantitative RT-PCR during 3T3-L1 adipocyte differentiation. *Int J Mol Med* **33**, 1209-1218
82. Tseng, L. T., Lin, C. L., Tzen, K. Y., Chang, S. C., and Chang, M. F. (2013) LMBD1 protein serves as a specific adaptor for insulin receptor internalization. *J Biol Chem* **288**, 32424-32432



## Figure Legends

**Figure 1. Acute and basal insulin signaling in an *in vitro* hyperinsulinemia-induced insulin resistance model.** (A) The workflow of C2C12 myotube differentiation, high insulin treatment and serum starvation. (B) phospho-AKT (T308, S473) and (C) phospho-ERK1/2 stimulated by acute insulin after serum starvation. Myotubes cultured in control (0 nM insulin) or hyperinsulinemic (200 nM insulin) medium were stimulated with 0.2, 2 or 20 nM insulin for 1, 5, 10, 15 or 30 min (n = 4). (D) Basal levels of AKT and ERK phosphorylation before starvation (BS) and after serum starvation (AS)(n = 3 in BS groups; n = 10 in AS groups). \* p < 0.05, student t-test (paired t-test between insulin groups at each time points). # effect of hyperinsulinemia; & effect of starvation; % interaction between the two factors, 2-ANOVA.

**Figure 2. Effects of *in vitro* hyperinsulinemia and serum starvation on total and surface INSR.** (A) The level of total INSR protein before or after serum starvation. (B) Scheme of surface biotinylation to measure surface INSR. Biotins label all surface proteins which are then isolated by NeutrAvidin beads from lysates. Surface INSR in isolated proteins is detected by western blots. (C) The surface INSR abundance and the ratio of surface-to-total INSR (n = 3-4 in BS groups; n = 10 in AS groups). \* p<0.05, student t-test (paired t-test between insulin groups at each time points). # effect of hyperinsulinemia; & effect of starvation; % interaction between the two factors, 2-ANOVA.

**Figure 3. Effects of prolonged hyperinsulinemia on INSR phosphorylation *in vitro*.** (A) Basal phospho-INSR Y1150/1151 before or after serum starvation. (n = 3-4 in BS groups; n = 10 in AS groups). (B) Insulin-stimulated INSR phosphorylation after serum starvation (n=4). \* p<0.05, student t-test (paired t-test between insulin groups at each time points). # effect of hyperinsulinemia, 2-ANOVA.

**Figure 4. Effects of prolonged hyperinsulinemia and starvation on *Insr* transcription and FOXO1 phosphorylation *in vitro*.** (A) The mRNA levels of *Insr* isoform A or B (*Insr-A* or *B*) before and after starvation (BS and AS) assessed by qPCR. (B) The ratio of *Insr-A* to *Insr-B* mRNA. (C) *Igf1r* mRNA level. n=5. (D) Total and T24 phosphorylation of FOXO1 (n = 3 in BS groups, n = 10 in AS groups). \* p<0.05, student t-test (paired t-test between insulin groups at each time points).

**Figure 5. *In vivo* correlation between INSR abundance and fasting insulin or glucose in mouse skeletal muscle.** (A) INSR and fasting insulin in LFD-fed mice. (B) INSR and glucose in LFD-fed mice. (C) INSR and fasting insulin in HFD-fed mice. (D) INSR and glucose in HFD-fed mice. (n = 7-11)

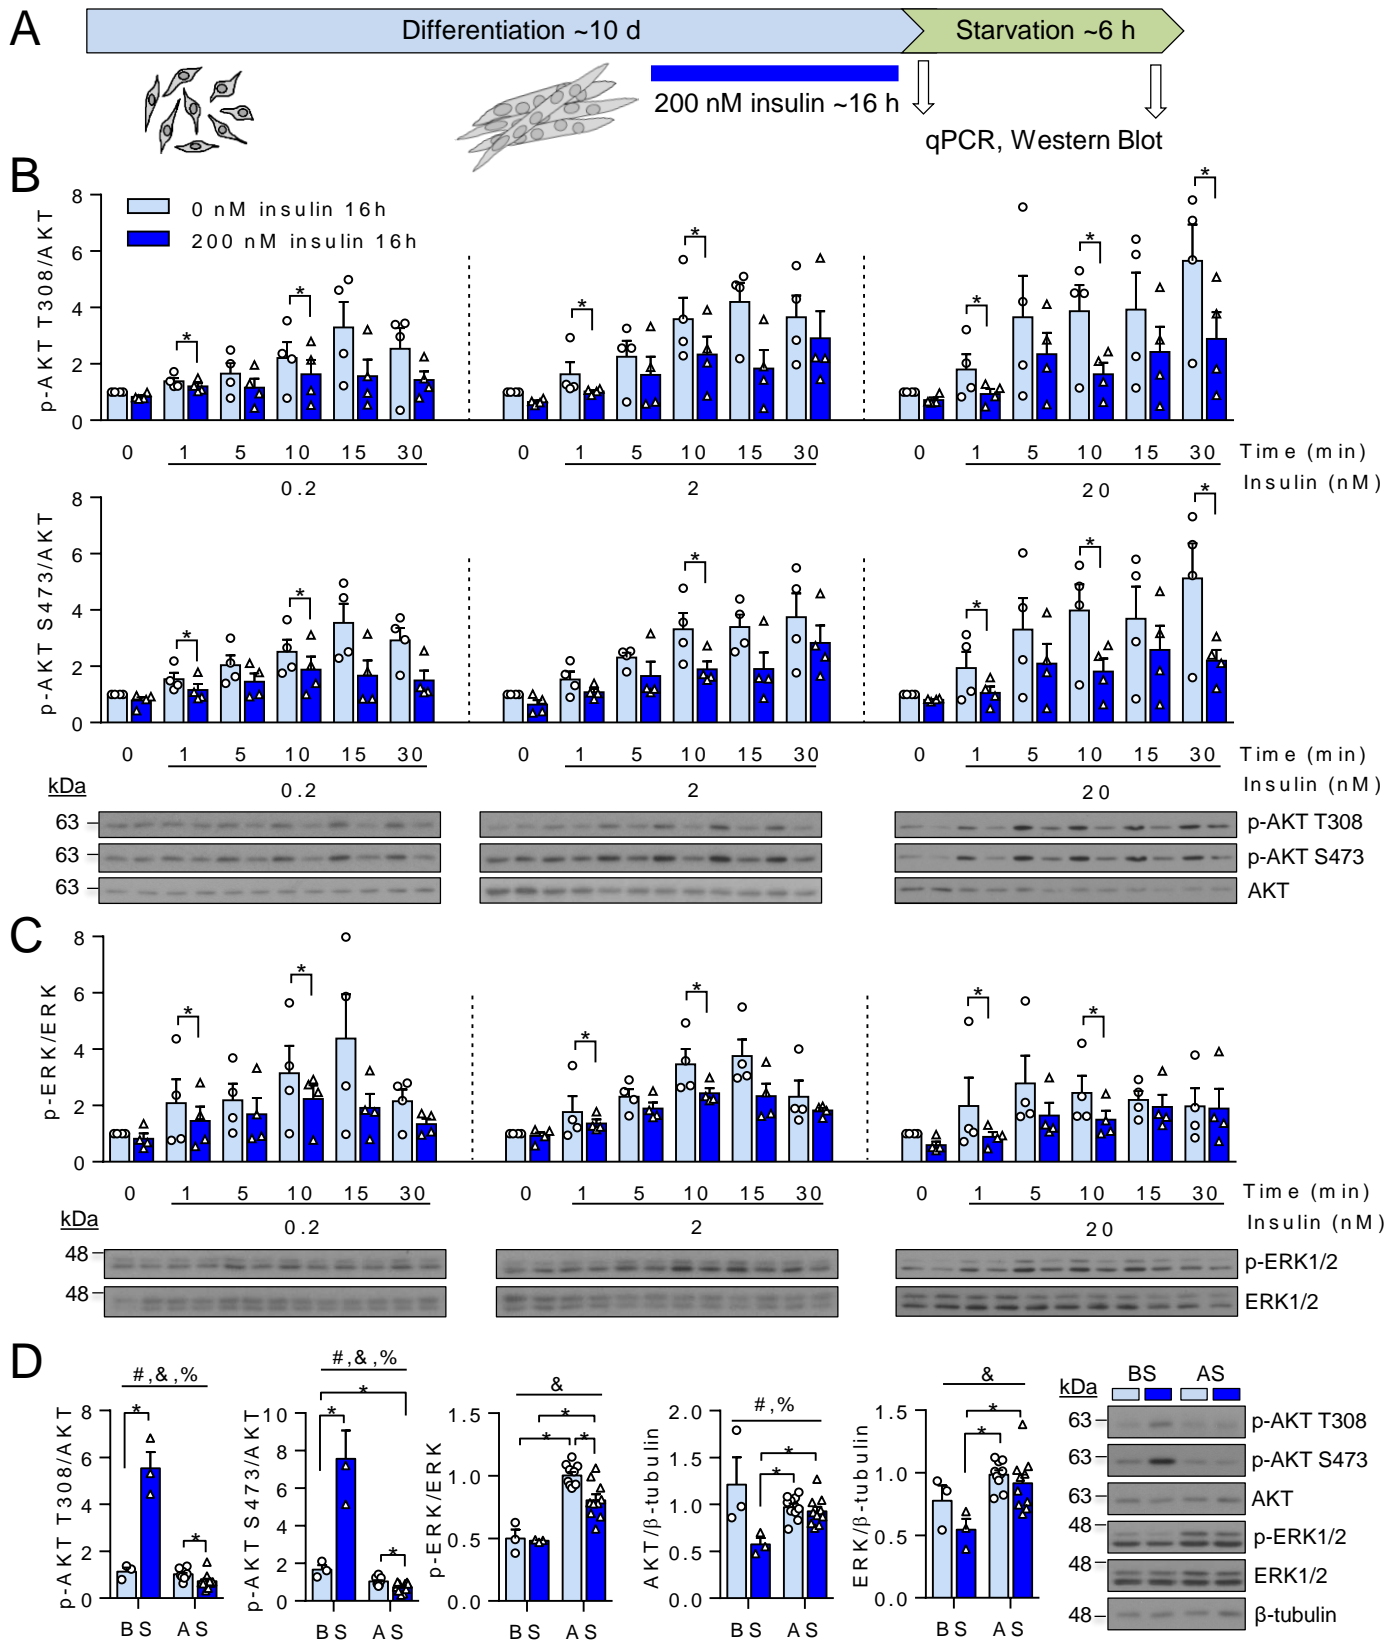

**Figure 1. Acute and basal insulin signaling in an *in vitro* hyperinsulinemia-induced insulin resistance model.**

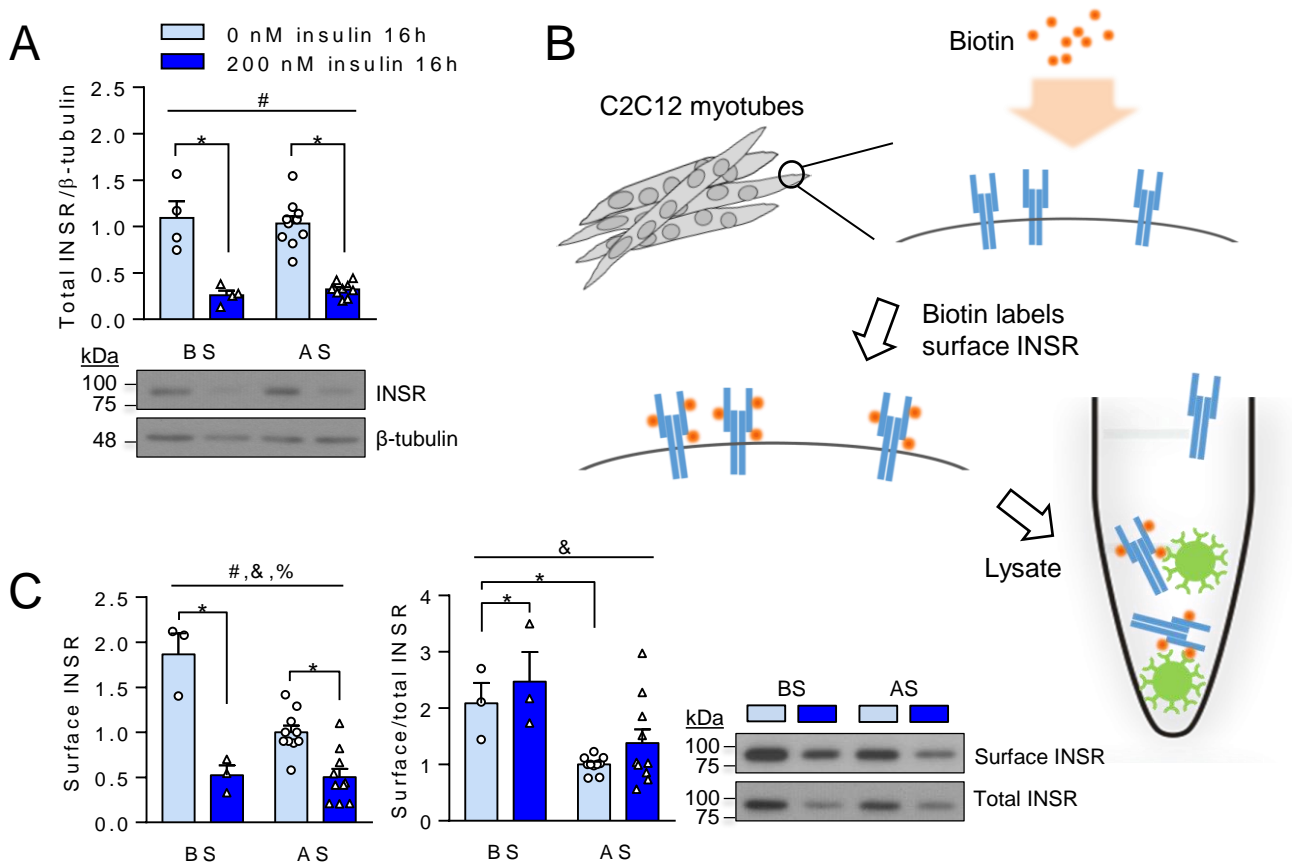

**Figure 2. Effects of *in vitro* hyperinsulinemia and serum starvation on total and surface INSR.**

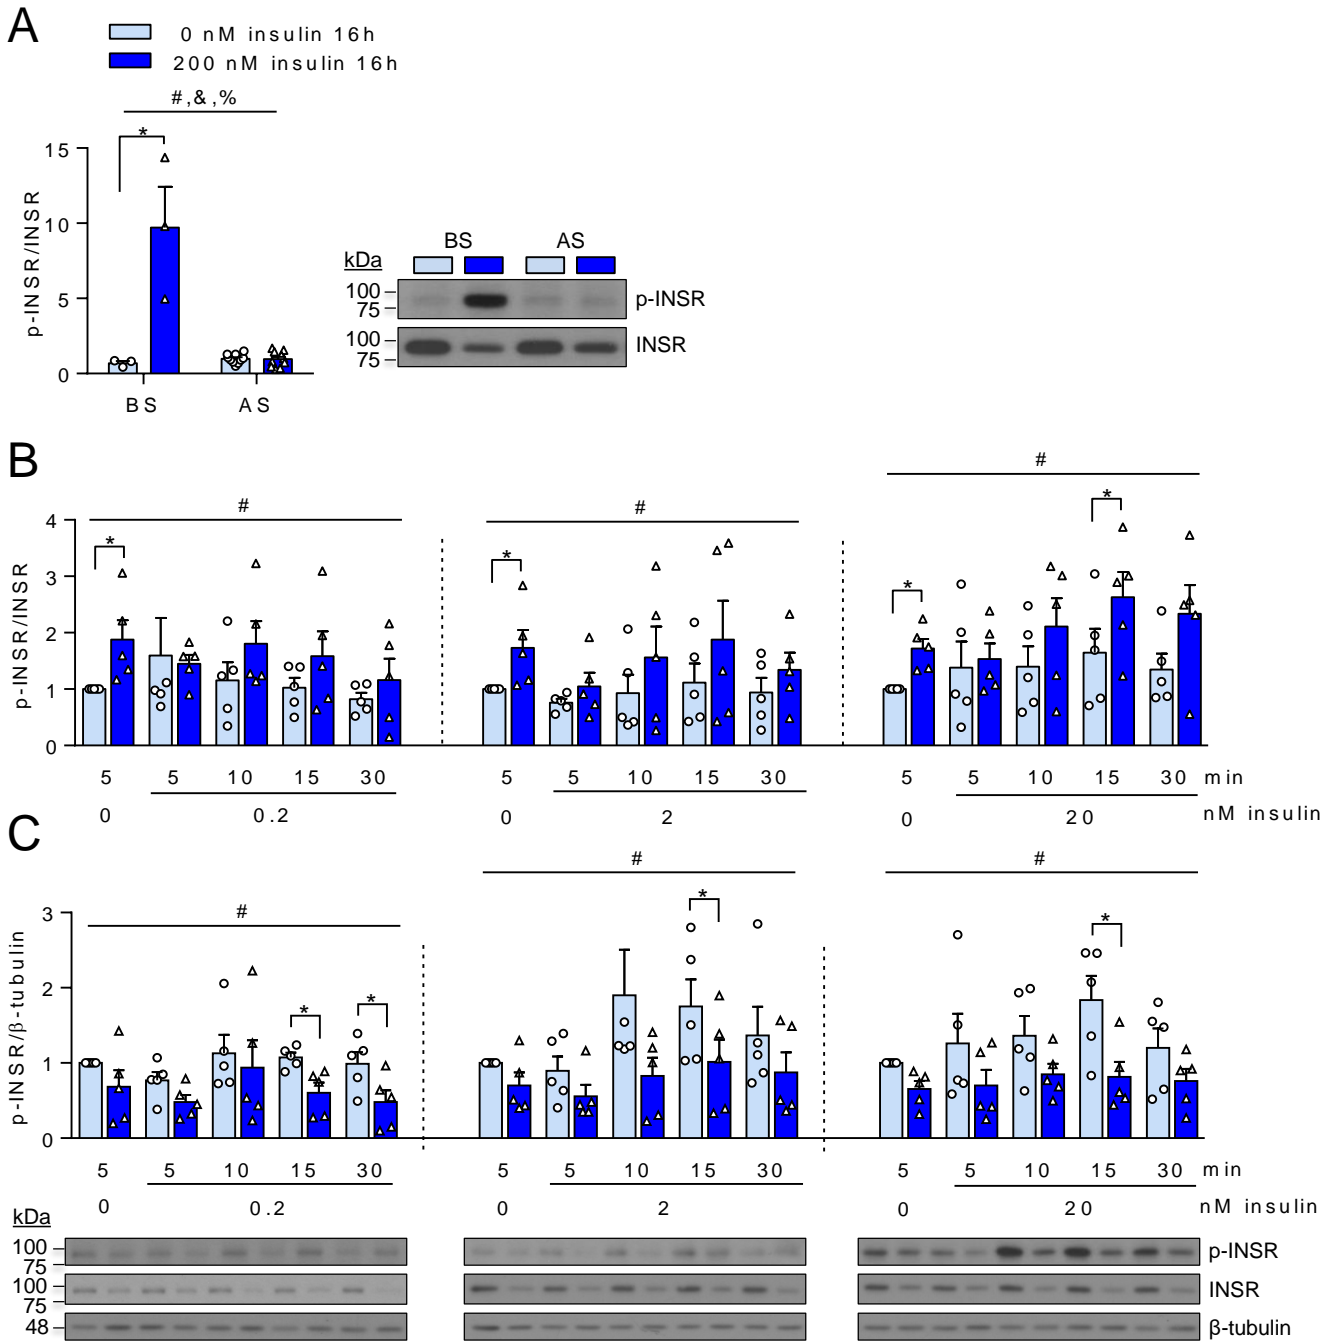

**Figure 3. Effects of prolonged hyperinsulinemia on INSR phosphorylation *in vitro*.**

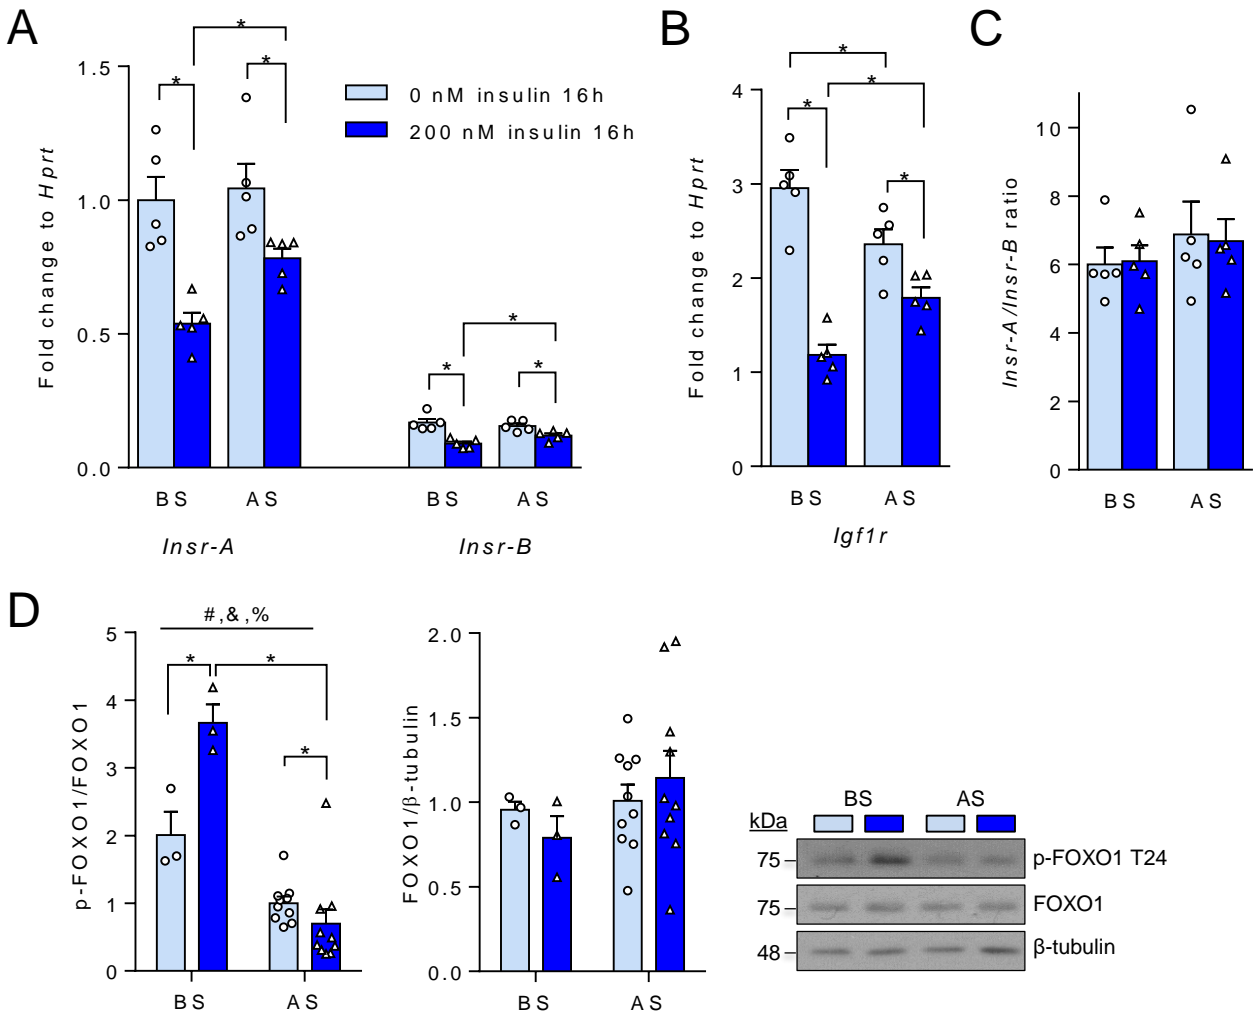

**Figure 4. Effects of prolonged hyperinsulinemia and starvation on *Insr* transcription and FOXO1 phosphorylation *in vitro*.**

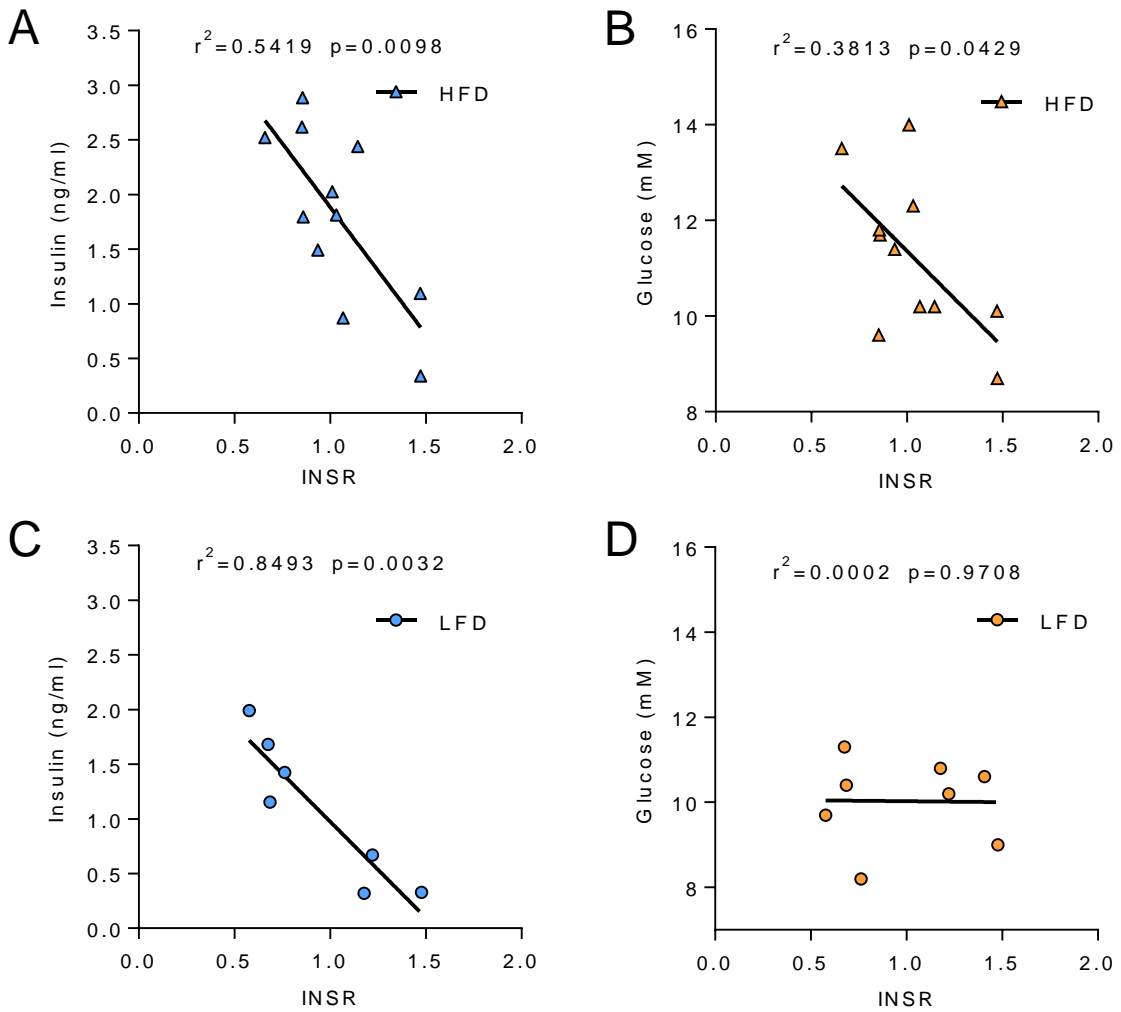

**Figure 5. *In vivo* correlation between INSR abundance and fasting insulin or glucose in mouse skeletal muscle.**
